# Supplementary material
Source: Royal Society of Chemistry journal article supplement (https://www.rsc.org/suppdata/nj/1999/827/902283j.pdf)

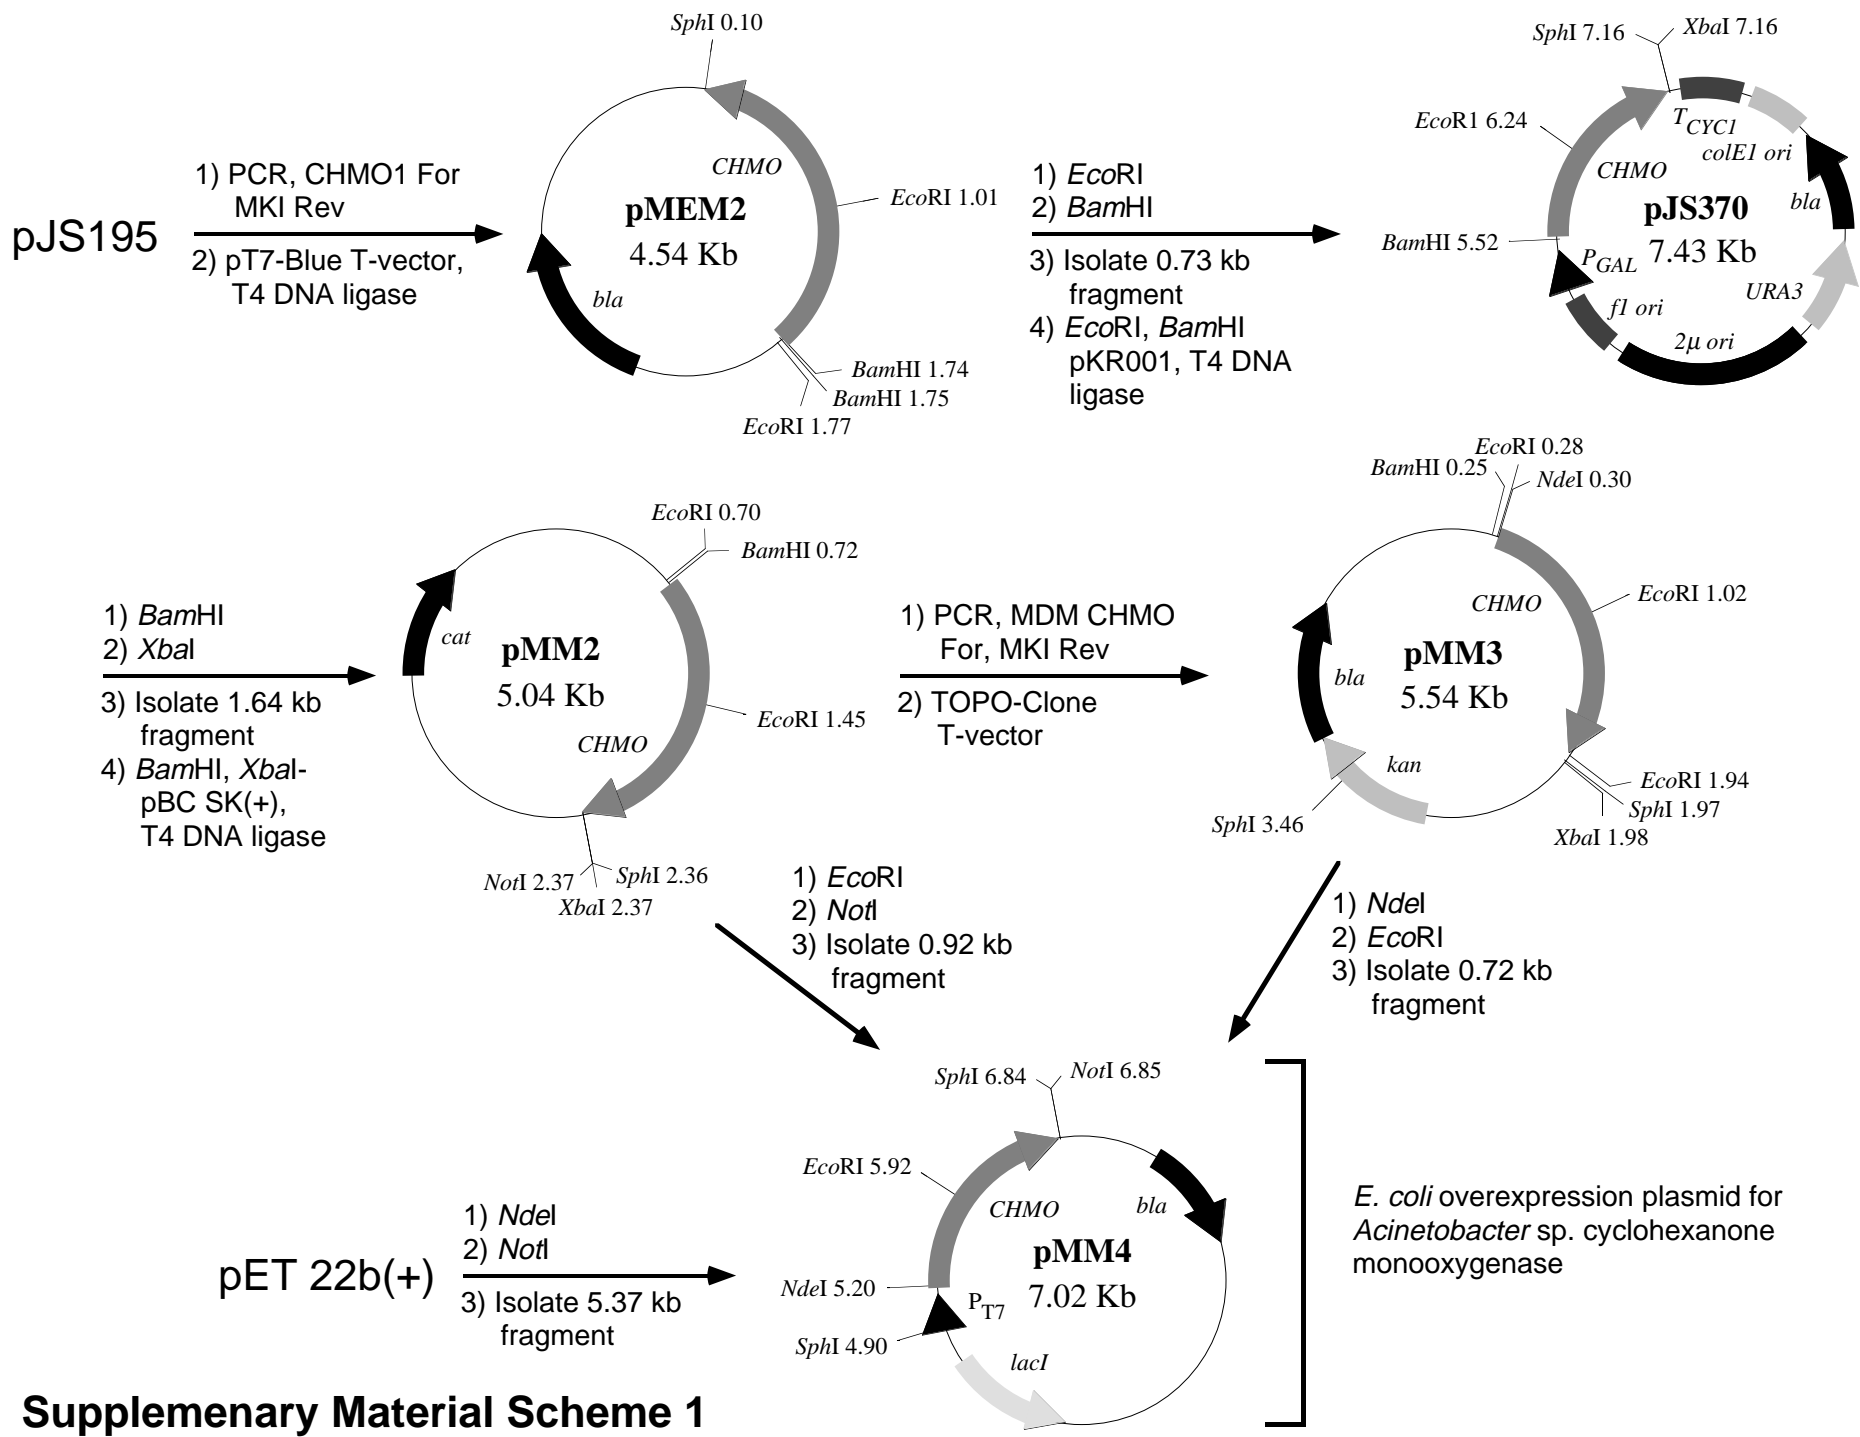

**Supplementary Material Scheme 1**

Supplement: Supplementary file 1 [file 902283j.pdf]
